# Supplementary material
Source: PubMed Central journal article supplement (PMC8288800)
Supplement: NIHMS1719266-supplement-Supplementary_Table_1.pdf [file NIHMS1719266-supplement-Supplementary_Table_1.pdf]

---

**Supplementary information**

---

**Long noncoding RNAs in cancer metastasis**

---

In the format provided by the  
authors and unedited

**Table 1. Methodological considerations when studying lncRNAs**

| Method                                        | Effect on RNA transcript                                                                                         | Effect on DNA locus                                      | Additional Considerations                                                                                                               |
|-----------------------------------------------|------------------------------------------------------------------------------------------------------------------|----------------------------------------------------------|-----------------------------------------------------------------------------------------------------------------------------------------|
| RNA interference                              | Transcript depletion through RISC                                                                                | Generally not impacted in mammalian cells                | Potential for widespread off target effects <sup>1</sup>                                                                                |
| Genetic locus deletion                        | Ablates transcript                                                                                               | Removes potential <i>cis</i> regulatory sequences        | Function may be ascribed to either RNA transcript or DNA sequence <sup>2</sup>                                                          |
| Promoter deletion                             | Disables transcription                                                                                           | Removes local regulatory sequences                       | Promoter sequences may be used as enhancer or silencer of distant genes <sup>3,4</sup>                                                  |
| Insertion of transcription termination signal | Prevents production of mature transcript                                                                         | Minor genetic modification of DNA sequence               | The process of transcription is retained, depending on location of poly-adenylation signal insertion <sup>5</sup>                       |
| CRISPR interference                           | Inhibits transcriptional initiation and elongation using engineered dCas9-repressor fusions                      | Deposits H3K9me3 heterochromatin at promoter region      | Narrow window of activity allows perturbation of complex lncRNA loci <sup>6</sup> . Can epigenetically silence enhancers <sup>7</sup> . |
| Splice site mutagenesis                       | Disrupts splicing of multi-exon transcripts                                                                      | Potential deletion of key <i>cis</i> regulatory elements | Allows transcription of lncRNA locus. LncRNA function might not depend on mature primary transcript <sup>8</sup>                        |
| Antisense oligonucleotides                    | Primarily depletes nascent RNA through RNase-H and XRN2                                                          | Not directly impacted                                    | Off target effects and <i>in vivo</i> toxicity require careful design of ASO agents <sup>9,10</sup>                                     |
| CRISPR-Cas13 direct RNA targeting             | Guide RNA-directed RNA cleavage                                                                                  | Not directly impacted                                    | Greater specificity than RNAi <sup>11</sup> , but emerging method for lncRNAs with variable knockdown efficiency <sup>12</sup>          |
| Transgenic overexpression                     | Overexpression typically at supraphysiologic levels, unless local regulatory elements are retained <sup>13</sup> | Genetic integration may activate local gene expression.  | Approach assumes <i>trans</i> mechanism of action <sup>14</sup>                                                                         |
| CRISPR activation                             | Promotes transcription using engineered dCas9-transactivator fusions                                             | May generate euchromatin modifications                   | Can potentially activate enhancer regions in addition to gene transcription <sup>15</sup>                                               |
| CRISPR display ectopic localization           | Enables guide RNA-directed localization of exogenous lncRNA transcript fusions                                   | Not directly impacted                                    | Assumes <i>trans</i> mechanism of action and efficacy may be limited by lncRNA structure and size <sup>16</sup>                         |

Overview of commonly used and emerging methods for loss of function or gain of function experimentation to study lncRNAs. Each method entails particular ramifications for RNA and DNA locus disruption that should be carefully considered when interpreting results from these assays. Additional discussion can be found in prior reviews<sup>17,18</sup>.

## References

1. Peretz, L. *et al.* Combined shRNA over CRISPR/cas9 as a methodology to detect off-target effects and a potential compensatory mechanism. *Sci. Rep.* **8**, 93–13 (2018).
2. Sauvageau, M. *et al.* Multiple knockout mouse models reveal lincRNAs are required for life and brain development. *eLife* **2**, e01749 (2013).
3. Li, W. *et al.* Functional roles of enhancer RNAs for oestrogen-dependent transcriptional activation. *Nature* **498**, 516–520 (2013).
4. Cho, S. W. *et al.* Promoter of lincRNA Gene PVT1 Is a Tumor-Suppressor DNA Boundary Element. *Cell* **173**, 1398–1412.e22 (2018).
5. Engreitz, J. M. *et al.* Local regulation of gene expression by lincRNA promoters, transcription and splicing. *Nature* **539**, 452–455 (2016).
6. Liu, S. J. *et al.* CRISPRi-based genome-scale identification of functional long noncoding RNA loci in human cells. *Science* **355**, eaah7111 (2017).
7. Fulco, C. P. *et al.* Systematic mapping of functional enhancer-promoter connections with CRISPR interference. *Science* **354**, 769–773 (2016).
8. Liu, Y. *et al.* Genome-wide screening for functional long noncoding RNAs in human cells by Cas9 targeting of splice sites. *Nat Biotechnol* **1656**, 175–1210 (2018).
9. Yoshida, T. *et al.* Evaluation of off-target effects of gapmer antisense oligonucleotides using human cells. *Genes Cells* **24**, 827–835 (2019).
10. Swayze, E. E. *et al.* Antisense oligonucleotides containing locked nucleic acid improve potency but cause significant hepatotoxicity in animals. *Nucleic Acids Res.* **35**, 687–700 (2007).
11. Abudayyeh, O. O. *et al.* RNA targeting with CRISPR-Cas13. *Nature* **550**, 280–284 (2017).
12. Xu, D. *et al.* A CRISPR/Cas13-based approach demonstrates biological relevance of vline class of long non-coding RNAs in anticancer drug response. *Sci. Rep.* **10**, 1794–13 (2020).
13. Andersen, R. E. *et al.* The Long Noncoding RNA Pnky Is a Trans-acting Regulator of Cortical Development In Vivo. *Developmental Cell* **49**, 632–642.e7 (2019).
14. Lewandowski, J. P. *et al.* The Firre locus produces a trans-acting RNA molecule that functions in hematopoiesis. *Nature Communications* **10**, 5137–13 (2019).
15. Matharu, N. *et al.* CRISPR-mediated activation of a promoter or enhancer rescues obesity caused by haploinsufficiency. *Science* **363**, eaau0629 (2019).
16. Shechner, D. M., Haciasuleyman, E., Younger, S. T. & Rinn, J. L. Multiplexable, locus-specific targeting of long RNAs with CRISPR-Display. *Nat Meth* **12**, 664–670 (2015).
17. Bassett, A. R. *et al.* Considerations when investigating lincRNA function in vivo. *eLife* **3**, e03058 (2014).
18. Liu, S. J. & Lim, D. A. Modulating the expression of long non-coding RNAs for functional studies. *EMBO reports* e46955–11 (2018). doi:10.15252/embr.201846955
